# Supplementary material for: Ambiguity attitudes, framing, and consistency
Source: Springer Nature journal article supplement (doi:10.1007/s11238-016-9544-1), 2016-03-30
Supplement: MOESM1 [file 11238_2016_9544_MOESM1_ESM.pdf]

# Ambiguity Attitudes, Framing, and Consistency

## Online Appendix

Alex Voorhoeve, Philosophy, Logic and Scientific Method, LSE

Contact: a.e.voorhoeve [at] lse.ac.uk

Ken Binmore, Economics, UCL

Arnaldur Stefánsson, Economics, Uppsala University

Lisa Stewart, Psychology, Australian National University

March 15, 2016

## Contents

|          |                                                                         |           |
|----------|-------------------------------------------------------------------------|-----------|
| <b>1</b> | <b>Results and Robustness to Excluding Non-Students</b>                 | <b>3</b>  |
| 1.1      | Framing . . . . .                                                       | 3         |
| 1.1.1    | Versions . . . . .                                                      | 3         |
| 1.1.2    | Gain vs. Loss Aggregates . . . . .                                      | 4         |
| 1.1.3    | Implicit vs. Explicit Aggregates . . . . .                              | 5         |
| 1.1.4    | Permissibility of Aggregating Versions Excluding Non-Students . . . . . | 6         |
| 1.1.5    | Modelling the data excluding Non-Students . . . . .                     | 7         |
| 1.2      | Inconsistency . . . . .                                                 | 8         |
| <b>2</b> | <b>Are the First and Final Round Different?</b>                         | <b>9</b>  |
| <b>3</b> | <b>Robustness to Excluding Version LE</b>                               | <b>12</b> |
| <b>4</b> | <b>Permissibility of Aggregating Versions</b>                           | <b>12</b> |
| <b>5</b> | <b>Demography and Correlations</b>                                      | <b>14</b> |
| <b>6</b> | <b>Test Statistics</b>                                                  | <b>16</b> |
| 6.1      | The Hypothesis . . . . .                                                | 16        |
| 6.2      | Unconditional . . . . .                                                 | 16        |
| 6.3      | Conditional . . . . .                                                   | 16        |
|          | <b>References</b>                                                       | <b>17</b> |

## List of Figures

|    |                                                                                 |   |
|----|---------------------------------------------------------------------------------|---|
| A1 | Significantly different distributions when we consider students only? . . . . . | 6 |
| A2 | The best-fitting models, students only . . . . .                                | 7 |

|    |                                                               |    |
|----|---------------------------------------------------------------|----|
| A3 | Weighted distribution of types by consistency group . . . . . | 9  |
| A4 | Results for Version GI <sub>2</sub> . . . . .                 | 13 |
| A5 | Significantly different distributions? . . . . .              | 14 |

## List of Tables

|     |                                                                                          |    |
|-----|------------------------------------------------------------------------------------------|----|
| A1  | The framing in experiments GI <sub>2</sub> , GI <sub>3</sub> , LI, LE and GE . . . . .   | 3  |
| A2  | Test of independence between versions . . . . .                                          | 3  |
| A3  | P-values from test of independence between versions . . . . .                            | 4  |
| A4  | Test of independence between Gain and Loss aggregates . . . . .                          | 5  |
| A5  | Test of independence between Implicit and Explicit aggregates . . . . .                  | 5  |
| A6  | Test of independence between inconsistency groups . . . . .                              | 8  |
| A7  | Ambiguity attitudes' independence in round 1 versus round 4 using McNemar test . . . . . | 11 |
| A8  | Ambiguity attitudes' independence in round 1 versus round 4 using K-S test . . . . .     | 11 |
| A9  | Test of independence between inconsistency groups excluding Version LE . . . . .         | 12 |
| A10 | Gender and status . . . . .                                                              | 14 |
| A11 | Age distribution . . . . .                                                               | 15 |
| A12 | Correlation coefficients . . . . .                                                       | 15 |

# 1 Results and Robustness to Excluding Non-Students

## 1.1 Framing

This section presents results on the effect of framing by testing whether the proportions of types depend on the framing of choices. Table A1 summarizes the framing in experiments GI<sub>2</sub>, GI<sub>3</sub>, LI, LE and GE.

| <b>Framing</b>                                                     | <b>Gain</b>                       | <b>Loss</b> |
|--------------------------------------------------------------------|-----------------------------------|-------------|
| <b>Implicit</b> (Subjects must infer ambiguous alternative)        | GI <sub>2</sub> , GI <sub>3</sub> | LI          |
| <b>Explicit</b> (Subjects are told which alternative is ambiguous) | GE                                | LE          |

Table A1: The framing in experiments GI<sub>2</sub>, GI<sub>3</sub>, LI, LE and GE

### 1.1.1 Versions

With pairwise comparisons of the versions, we find a significant difference at the 0.05 level for stp between version LI and LE, and between versions LE and GE. Similarly, we find a significant difference at the 0.10 level for PIR between the same versions. Furthermore, we find a significant difference at the 0.10 level for sas between versions GI<sub>3</sub> and LE. When only using students the results are similar. In the student sample, we find a significantly greater difference for PIR, and instead of sas being significantly different between versions GI<sub>3</sub> and LE, we now find a significant difference between versions LI and LE.

|     | Version         |    |    |    | Significance            |
|-----|-----------------|----|----|----|-------------------------|
|     | GI <sub>3</sub> | LI | LE | GE |                         |
| waa | 43              | 44 | 49 | 44 |                         |
| saa | 28              | 27 | 31 | 31 |                         |
| stp | 46              | 51 | 36 | 52 | ** (LI,LE), ** (LE,GE)  |
| PIR | 32              | 36 | 24 | 38 | * (LI,LE), * (LE,GE)    |
| was | 20              | 19 | 25 | 21 |                         |
| sas | 7               | 8  | 16 | 12 | * (GI <sub>3</sub> ,LE) |

|     | Version         |    |    |    | Significance           |
|-----|-----------------|----|----|----|------------------------|
|     | GI <sub>3</sub> | LI | LE | GE |                        |
| waa | 43              | 45 | 53 | 45 |                        |
| saa | 30              | 27 | 34 | 33 |                        |
| stp | 46              | 52 | 32 | 56 | ** (LI,LE), ** (LE,GE) |
| PIR | 32              | 40 | 21 | 42 | ** (LI,LE), ** (LE,GE) |
| was | 21              | 18 | 24 | 18 |                        |
| sas | 8               | 6  | 16 | 11 | * (LI,LE)              |

(a) All

(b) Students

*Comment a:* \*(i&j) and \*\*(i&j) means that the proportions are significantly different between versions i and j. One star indicates significance at the 10% level and two stars indicate significance at the 5% level.

*Comment b:* P-values from test of independence using equation (A1).

Table A2: Test of independence between versions

|    | GI <sub>3</sub> | LI    | LE    |
|----|-----------------|-------|-------|
| LI | 0.860           |       |       |
| LE | 0.712           | 0.581 |       |
| GE | 0.768           | 0.631 | 0.935 |

(a) saa - All

|    | GI <sub>3</sub> | LI    | LE    |
|----|-----------------|-------|-------|
| LI | 0.916           |       |       |
| LE | 0.471           | 0.523 |       |
| GE | 0.928           | 0.990 | 0.525 |

(c) waa - All

|    | GI <sub>3</sub> | LI    | LE    |
|----|-----------------|-------|-------|
| LI | 0.501           |       |       |
| LE | 0.195           | 0.048 |       |
| GE | 0.453           | 0.923 | 0.043 |

(e) stp - All

|    | GI <sub>3</sub> | LI    | LE    |
|----|-----------------|-------|-------|
| LI | 0.617           |       |       |
| LE | 0.240           | 0.092 |       |
| GE | 0.443           | 0.773 | 0.055 |

(g) PIR - All

|    | GI <sub>3</sub> | LI    | LE    |
|----|-----------------|-------|-------|
| LI | 0.832           |       |       |
| LE | 0.084           | 0.112 |       |
| GE | 0.325           | 0.420 | 0.433 |

(i) sas - All

|    | GI <sub>3</sub> | LI    | LE    |
|----|-----------------|-------|-------|
| LI | 0.928           |       |       |
| LE | 0.430           | 0.367 |       |
| GE | 0.915           | 0.840 | 0.492 |

(k) was - All

|    | GI <sub>3</sub> | LI    | LE    |
|----|-----------------|-------|-------|
| LI | 0.787           |       |       |
| LE | 0.576           | 0.418 |       |
| GE | 0.661           | 0.486 | 0.895 |

(b) saa - Students

|    | GI <sub>3</sub> | LI    | LE    |
|----|-----------------|-------|-------|
| LI | 0.778           |       |       |
| LE | 0.229           | 0.349 |       |
| GE | 0.745           | 0.959 | 0.389 |

(d) waa - Students

|    | GI <sub>3</sub> | LI    | LE    |
|----|-----------------|-------|-------|
| LI | 0.407           |       |       |
| LE | 0.116           | 0.020 |       |
| GE | 0.244           | 0.716 | 0.010 |

(f) stp - Students

|    | GI <sub>3</sub> | LI    | LE    |
|----|-----------------|-------|-------|
| LI | 0.353           |       |       |
| LE | 0.139           | 0.021 |       |
| GE | 0.234           | 0.770 | 0.012 |

(h) PIR - Students

|    | GI <sub>3</sub> | LI    | LE    |
|----|-----------------|-------|-------|
| LI | 0.702           |       |       |
| LE | 0.156           | 0.078 |       |
| GE | 0.568           | 0.349 | 0.405 |

(j) sas - Students

|    | GI <sub>3</sub> | LI    | LE    |
|----|-----------------|-------|-------|
| LI | 0.664           |       |       |
| LE | 0.632           | 0.377 |       |
| GE | 0.736           | 0.934 | 0.437 |

(l) was - Students

*Comment:* P-values from test of independence using equation (A1).

Table A3: P-values from test of independence between versions

### 1.1.2 Gain vs. Loss Aggregates

We find no significant difference at the 0.05 level when comparing the Gain and Loss aggregates. However, stp and PIR are significantly different at the 0.10 level with higher proportions in the Gain aggregate (see Table A4). When we only use students, stp becomes significantly different at the 0.05 level.

|     | GAIN | LOSS | $p_T^F$ |     | GAIN | LOSS | $p_T^F$ |
|-----|------|------|---------|-----|------|------|---------|
| waa | 43   | 46   | 0.330   | waa | 44   | 48   | 0.128   |
| saa | 30   | 29   | 0.838   | saa | 31   | 30   | 0.792   |
| stp | 49   | 44   | 0.087*  | stp | 50   | 44   | 0.030** |
| PIR | 35   | 30   | 0.070*  | PIR | 37   | 31   | 0.062*  |
| was | 20   | 22   | 0.443   | was | 19   | 20   | 0.689   |
| sas | 9    | 12   | 0.201   | sas | 9    | 10   | 0.498   |
| N   | 161  | 163  |         | N   | 136  | 127  |         |

(a) All

(b) Students

Comment a: \* $p < 0.1$ , \*\* $p < 0.05$ , \*\*\* $p < 0.01$ .

Comment b: P-values from test of independence using equation (A1).

Table A4: Test of independence between Gain and Loss aggregates

### 1.1.3 Implicit vs. Explicit Aggregates

When comparing the Implicit and Explicit aggregates we find that the difference is significant at the 0.05 level for sas, with a higher share in the Explicit aggregates (see Table A5). When only using students, the difference for waa and saa also becomes significant at the 0.10 level, with higher shares in the Explicit aggregates.

|     | Implicit | Explicit | $p_T^F$ |     | Implicit | Explicit | $p_T^F$ |
|-----|----------|----------|---------|-----|----------|----------|---------|
| waa | 43       | 46       | 0.327   | waa | 44       | 49       | 0.083*  |
| saa | 28       | 31       | 0.227   | saa | 28       | 33       | 0.077*  |
| stp | 49       | 44       | 0.103   | stp | 49       | 44       | 0.146   |
| PIR | 34       | 31       | 0.258   | PIR | 36       | 32       | 0.186   |
| was | 20       | 23       | 0.161   | was | 19       | 21       | 0.456   |
| sas | 8        | 14       | 0.000** | sas | 7        | 13       | 0.001** |
| N   | 170      | 154      |         | N   | 145      | 118      |         |

(a) All

(b) Students

Comment a: \* $p < 0.1$ , \*\* $p < 0.05$ , \*\*\* $p < 0.01$ .

Comment b: P-values from test of independence using equation (A1).

Table A5: Test of independence between Implicit and Explicit aggregates

### 1.1.4 Permissibility of Aggregating Versions Excluding Non-Students

|                 | LI   | GE   | LE   |  | L    | I    |
|-----------------|------|------|------|--|------|------|
| GI <sub>3</sub> | 0.11 | 0.12 | 0.12 |  | 0.06 |      |
| LI              |      | 0.05 | 0.16 |  |      | 0.08 |
| GE              |      |      | 0.16 |  |      |      |

Figure A1: Significantly different distributions when we consider students only?

Comment: Using data from student subjects only, for each comparison between versions, we compute three K-S statistics comparing, respectively: (i) the distribution of  $r_1$ ; (ii) the distribution of  $r_2$ ; and (iii) the sums of the parallels to the diagonal  $r_1 = r_2$ , starting in the NW corner. We report the largest of these. None of these are sufficiently large to confidently reject the hypothesis that the distributions are drawn from the same underlying distribution. (The borderline for rejecting the hypothesis that two distributions are drawn from the same distribution at the 10% level varies with population size. For comparisons of individual versions it is roughly 0.21; for the aggregates, it is roughly 0.15.)

### 1.1.5 Modelling the data excluding Non-Students

| Model parameters                                                                                        | GI <sub>3</sub> | LI    | GE    | LE    | G     | L     |
|---------------------------------------------------------------------------------------------------------|-----------------|-------|-------|-------|-------|-------|
| $1 - a$ (likelihood of diverging from stp in an ambiguity-seeking direction when given the opportunity) | 0.10            | 0.11  | 0.09  | 0.11  | 0.11  | 0.11  |
| $1 - d$ (likelihood of diverging from stp in an ambiguity-averse direction when given the opportunity)  | 0.23            | 0.20  | 0.20  | 0.24  | 0.23  | 0.22  |
| $a - d$ (indicator of the prevalence of ambiguity aversion over seeking)                                | 0.13            | 0.09  | 0.11  | 0.13  | 0.12  | 0.11  |
| $\mu$ (mean of the distribution along the SW-NE diagonal)                                               | 0.31            | 0.31  | 0.33  | 0.32  | 0.32  | 0.32  |
| $\sigma$ (standard deviation)                                                                           | 0.036           | 0.037 | 0.050 | 0.062 | 0.041 | 0.042 |
| <b>Fit</b>                                                                                              |                 |       |       |       |       |       |
| $K_I$ ( $r_1 = r_2$ diagonal)                                                                           | 0.05            | 0.07  | 0.06  | 0.09  | 0.07  | 0.10  |
| $K_{II}$ (parallels to $r_1 = r_2$ diagonal)                                                            | 0.07            | 0.04  | 0.03  | 0.07  | 0.02  | 0.05  |

Figure A2: The best-fitting models, students only

Comment: In the top part of the table, the columns give the parameters of the model that best fits the data for the respective versions (or aggregation of versions). The bottom part gives our two K-S statistics for these instantiations of the model (lower numbers indicate a better fit). All best-fitting models pass our K-S tests. For individual versions, the lower limit for the 10% confidence level is roughly 0.13; for combined versions, it is roughly 0.11 (because of a larger population size).

## 1.2 Inconsistency

This section presents results on whether ambiguity attitudes correlate with inconsistency. For each type of ambiguity attitude, independence tests are used to test whether the observed proportions ( $\rho_{i,T}^M$ ) are significantly different between inconsistency groups using equation (A2). We find that ambiguity neutrality (stp and PIR) decreases monotonically with inconsistency, and that the difference in the prevalence of these types between the Low and High inconsistency groups is significant at the 0.05 level. Ambiguity seeking (sas and was) increases monotonically with inconsistency and the difference between the Low and High inconsistency groups is significant at the 0.05 level. These differences remain significant even if we exclude the area devoted to PIR (we perform this robustness test because there is a small overlap between PIR on the one hand and sas and was on the other, as detailed in Figure 2 of the main paper), and when only considering students. These dynamics are summarized in Figure A3.

|         | Low | Moderate | High | $p_T^M$ |
|---------|-----|----------|------|---------|
| waa     | 45  | 44       | 43   | 0.967   |
| saa     | 33  | 27       | 28   | 0.724   |
| stp     | 63  | 45       | 34   | 0.001** |
| PIR     | 48  | 33       | 21   | 0.002** |
| was     | 11  | 22       | 33   | 0.004** |
| sas     | 4   | 10       | 19   | 0.007** |
| waa\PIR | 45  | 39       | 37   | 0.548   |
| saa\PIR | 26  | 21       | 21   | 0.758   |
| was\PIR | 13  | 18       | 29   | 0.031** |
| sas\PIR | 2   | 6        | 16   | 0.006** |

(a) All

|     | Low | Moderate | High | $p_T^M$ |
|-----|-----|----------|------|---------|
| waa | 46  | 44       | 45   | 1       |
| saa | 33  | 27       | 30   | 0.773   |
| stp | 63  | 45       | 33   | 0.003** |
| PIR | 48  | 34       | 22   | 0.009** |
| was | 10  | 22       | 32   | 0.01**  |
| sas | 4   | 10       | 19   | 0.013** |

(b) Students

*Comment a:* \* $p < 0.1$ , \*\* $p < 0.05$ , \*\*\* $p < 0.01$ .

*Comment b:* P-value from the test of independence using equation (A2).

Table A6: Test of independence between inconsistency groups



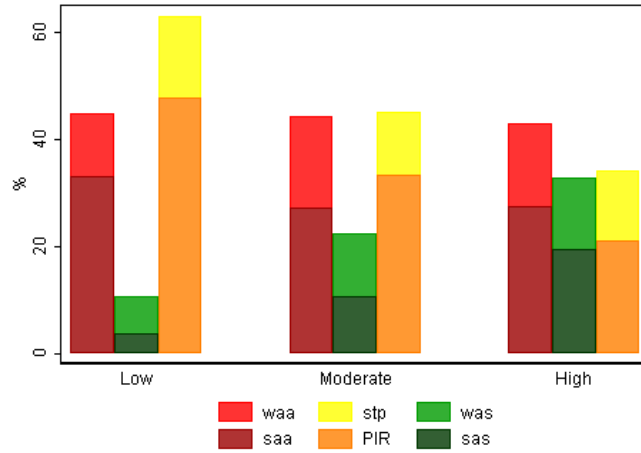

(a) Using all squares

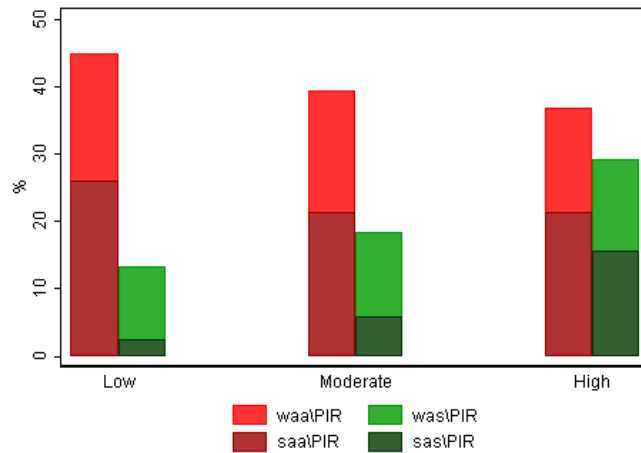

(b) Excluding *PIR* squares

Figure A3: Weighted distribution of types by consistency group

## 2 Are the First and Final Round Different?

As mentioned in the main text, two questions arise about our use of a titration to reveal subjects' ambiguity attitudes. The first is whether it gives some subjects a reason to misrepresent their preferences in the very first choice, because they would thereby get access to alternatives they regard as more favourable. The monetary payoffs associated with each bet were chosen to make such misrepresentation unprofitable for risk-neutral subjects who honour the principle of insufficient reason, but some ambiguity-averse subjects would profit from it. For example, some ambiguity-averse subjects would prefer to incur the expected cost of choosing the ambiguous option against their preference in the first choice

in our titration in order to gain access to two subsequent bets with a higher proportion of red cards; an ambiguity-averse subject who chose in this manner would then be classified as ambiguity neutral and/or ambiguity seeking. The phenomenon could also arise for some ambiguity-seeking subjects, who might prefer to incur the expected cost of choosing against their preference in the first choice in order to gain access to two subsequent bets with a greater share of ambiguous cards; an ambiguity-seeking subject who chose in this manner would then be classified as ambiguity neutral and/or ambiguity loving.

We believe it is unlikely that such misrepresentation occurred on a significant scale. Subjects were not informed about the titrations they would face and so lacked the knowledge required to exploit the opportunity for misrepresentation. And a subject who chose in line with their true preferences in round 1 would not learn what would have happened if they had chosen differently. Nonetheless, it is possible that some inquisitive subjects strayed from their preferred choices in rounds 2 and 3 and made correct conjectures about the decision tree which would then inform their behaviour in round 4. Some subjects who displayed their true ambiguity aversion in round 1 would then have made choices consistent with ambiguity neutrality and/or ambiguity seeking in round 4. We therefore investigated whether such a shift occurred. Tables A7 and A8 report the results of two tests for all of the versions of our experiment (GI<sub>2</sub> through LE) that we draw on in the main paper.

Table A7 reports the distribution of ambiguity attitudes in round 1 and round 4; it also reports the results of a McNemar tests on the proportion of subjects who “switched” towards or away from each attitude between these rounds. In four out of five experiments, there is a modest (and not statistically significant) increase in behaviour consistent with ambiguity aversion. In one case (version LI), there is a decrease in behaviour consistent with strong ambiguity aversion (significant at the 5% level), but not with weak ambiguity aversion. We conclude that there is no evidence for an across-the-board shift away from ambiguity averse behaviour.

In all experiments, there is a shift away from ambiguity seeking, but this shift is modest and not statistically significant in four out of five experiments. Only in LE is this shift both large and statistically significant (at the 1% level). We conclude that there is only weak evidence of an across-the-board shift away from ambiguity seeking. Rather than use of the manipulation strategy, we conjecture that this is due to the fact that ambiguity seeking is not stable; as Charness et al. (2013) argue and as we show in Section 4 of the main paper, ambiguity seekers are highly inconsistent.

Table A8 reports the results of three Kolmogorov-Smirnov (K-S) tests on the distribution of answers across our  $8 \times 8$  grids. The results are in line with the tests reported in Table A7: only in version LE can we say with confidence that subjects’ responses in round 1 and round 4 are different. (Note that in this Appendix, we check that our results in the main paper are robust to excluding LE.)

The second question is whether paying subjects for a random selection of their choices allows them to hedge across choices, thereby distorting the representation of their ambiguity attitudes (Bade, 2015; Oechssler and Roomets, 2014). In our experiment, subjects could not hedge between rounds, because they were informed that each round used new decks. However, as noted in Binmore et al. (2012, p. 228), subjects who knew the decision trees they faced could hedge within the two parts of a given round by choosing  $B_a$  when offered the choice between  $R_k$  and  $B_a$ , and choosing  $R&W_a$  when offered the choice between  $W&B_k$  and  $R&W_a$ . Since each choice is equally likely to be played for real, this is equivalent to turning down an equiprobable lottery between  $R_k$  and  $W&B_k$  in favour of an equiprobable lottery between  $B_a$  and  $R&W_a$ . The latter has a probability 1/2 of winning. No appeal to the

principle of insufficient reason is then necessary to justify playing according to its tenets.

We believe it is unlikely that subjects employed such a hedging strategy. In the first round, subjects lacked the requisite knowledge of the decision trees they faced and, as mentioned, we found no evidence of a systematic decrease in ambiguity aversion in subsequent rounds. Moreover, the strategy is rather complex (it involves thinking several choices ahead and matching one’s behaviour in a one-winning-colour choice with one’s later behaviour in a corresponding two-winning colour choice). Indeed, in Binmore et al. (2012), we compared a version of our experiments which allowed a simpler form of hedging with one in which this opportunity was eliminated, and our statistical tests were not able to distinguish the two data sets.

|         |     | GI <sub>2</sub> |    |          | GI <sub>3</sub> |    |          | LI |    |          | GE |    |          | LE |    |          |
|---------|-----|-----------------|----|----------|-----------------|----|----------|----|----|----------|----|----|----------|----|----|----------|
|         |     | 1               | 4  | <i>p</i> | 1               | 4  | <i>p</i> | 1  | 4  | <i>p</i> | 1  | 4  | <i>p</i> | 1  | 4  | <i>p</i> |
| Averse  | waa | 42              | 45 | 0.84     | 38              | 50 | 0.39     | 50 | 37 | 0.04**   | 42 | 46 | 0.70     | 44 | 55 | 0.13     |
|         | saa | 26              | 28 | 1.00     | 26              | 31 | 0.69     | 31 | 26 | 0.38     | 31 | 32 | 1.00     | 30 | 33 | 0.85     |
| Neutral | stp | 46              | 51 | 0.35     | 46              | 51 | 0.15     | 41 | 58 | 0.00***  | 49 | 53 | 0.73     | 32 | 37 | 0.57     |
|         | PIR | 36              | 42 | 0.48     | 32              | 36 | 0.15     | 32 | 42 | 0.11     | 37 | 41 | 0.68     | 27 | 26 | 1.00     |
| Seeking | was | 28              | 25 | 0.68     | 21              | 15 | 0.13     | 23 | 22 | 1.00     | 22 | 20 | 0.85     | 38 | 15 | 0.00***  |
|         | sas | 13              | 13 | 0.77     | 10              | 5  | 0.18     | 12 | 11 | 1.00     | 14 | 11 | 0.79     | 23 | 10 | 0.02**   |

*Comment a:* \**p* < 0.1, \*\**p* < 0.05, \*\*\**p* < 0.01.

*Comment b:* P-values from McNemar Test: taking the null hypothesis to be that the prevalence of each attitude is independent of the round of the experiment.

*Comment c:* The columns GI<sub>2</sub>, GI<sub>3</sub>, etc. report the percentage share of choices consistent with each ambiguity attitude in each of our experiments? first (1) and final (4) rounds. (We mention only the experiments which we use for our results in the paper, which is why GI<sub>1</sub> is omitted.) The adjacent column reports the results of a McNemar test for each attitude on the distribution of subjects across a 2 × 2 grid with: (i) the number of subjects that displayed the attitude in both round 1 and 4; (ii) the number of subjects that displayed the attitude in 1 and did not display it in 4; (iii) the number of subjects that did not display it in round 1 and did display it in 4; and (iv) the number of subjects that did not display the attitude in both 1 and 4. The p-value displayed is the probability of obtaining the observed difference (or a greater difference) under the null hypothesis that the underlying distributions in the first and final rounds are the same.

Table A7: Ambiguity attitudes’ independence in round 1 versus round 4 using McNemar test

|           | GI <sub>2</sub> | GI <sub>3</sub> | LI   | GE   | LE     |
|-----------|-----------------|-----------------|------|------|--------|
| K-S tests | 0.09            | 0.13            | 0.13 | 0.05 | 0.23** |

*Comment a:* \*\* : no more than 5% chance of wrongly rejecting the hypothesis that the distributions are drawn from the same underlying distribution.

*Comment b:* For round 1 and round 4, we compared the distribution of responses across the whole of our 8 × 8 grid. For each comparison between round 1 and round 4 in a given version, we compute three Kolmogorov-Smirnov (K-S) statistics comparing, respectively: (i) the distribution of  $r_1$ ; the distribution of  $r_2$ ; (iii) the sums of the parallels to the diagonal  $r_1 = r_2$ . Lower K-S statistics indicate a smaller difference between rounds. We report the largest of these. In all versions but LE, these K-S tests do not permit us to say that the first and final round are different. (The borderline for 10% significance differs with population size in each version, but is roughly 0.19.)

Table A8: Ambiguity attitudes’ independence in round 1 versus round 4 using K-S test

### 3 Robustness to Excluding Version LE

In this section the independence analysis of Table A6 is replicated excluding Version LE. The results are presented in Table A9. Using the 0.05 level as a benchmark, excluding Version LE does not change the conclusions regarding the relationship between inconsistency and ambiguity.

|         | Low | Medium | High | $p_T^M$ |
|---------|-----|--------|------|---------|
| waa     | 44  | 43     | 43   | 0.995   |
| saa     | 32  | 26     | 28   | 0.815   |
| stp     | 67  | 46     | 35   | 0.001** |
| PIR     | 52  | 34     | 21   | 0.002** |
| was     | 10  | 23     | 32   | 0.007** |
| sas     | 3   | 11     | 17   | 0.022** |
| waa\PIR | 43  | 38     | 37   | 0.739   |
| saa\PIR | 23  | 21     | 22   | 0.978   |
| was\PIR | 12  | 18     | 29   | 0.035** |
| sas\PIR | 0   | 6      | 13   | 0.006** |

*Comment a:* \* $p < 0.1$ , \*\* $p < 0.05$ , \*\*\* $p < 0.01$ .

*Comment b:* P-value from the test of independence using equation (A2).

Table A9: Test of independence between inconsistency groups excluding Version LE

### 4 Permissibility of Aggregating Versions

First, we provide the aggregate results for Version GI<sub>2</sub> (see Figure A4). We do so in order to correct one error in the data reported for this Version in Binmore et al. (2012).

**Version GI<sub>2</sub>** (gains; ambiguity implicit)

percentages, 76 subjects, 4 observations each

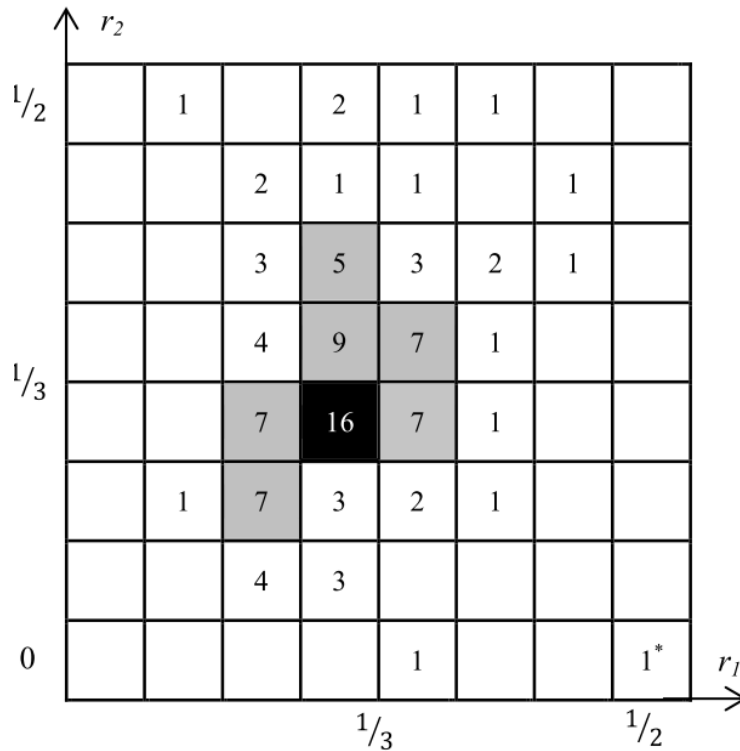

Figure A4: Results for Version GI<sub>2</sub>

Comment: Shaded squares indicate an especially high concentration of responses.

\* This cell entry was erroneously omitted in Binmore et al. (2012, p. 226). (The analysis in that paper was done with the correct data.)

We now ask whether it is permissible to aggregate the data from our experiments for the purposes of studying the relationship between consistency and ambiguity attitudes. We therefore employ the K-S test outlined in Section 3.2 of our main paper for all six versions of our experiment (Versions GI<sub>1</sub>, GI<sub>2</sub>, and GI<sub>3</sub> reported in Binmore et al. (2012) and Versions LI, LE and GE reported here) as follows:

1. We exclude a version from our aggregated data if the largest of the three K-S statistics indicates that it is different at the 10% significance level from any other version. This excludes only Version GI<sub>1</sub>.
2. For the remaining versions, we assess whether it is permissible to add various salient combinations of versions to other such combinations. E.g. we compare “all gain versions” (Version GI<sub>2</sub>, GI<sub>3</sub>, and GE) to “all loss versions” (LI and LE). No version or combination of versions is excluded by this test (see Figure A5).

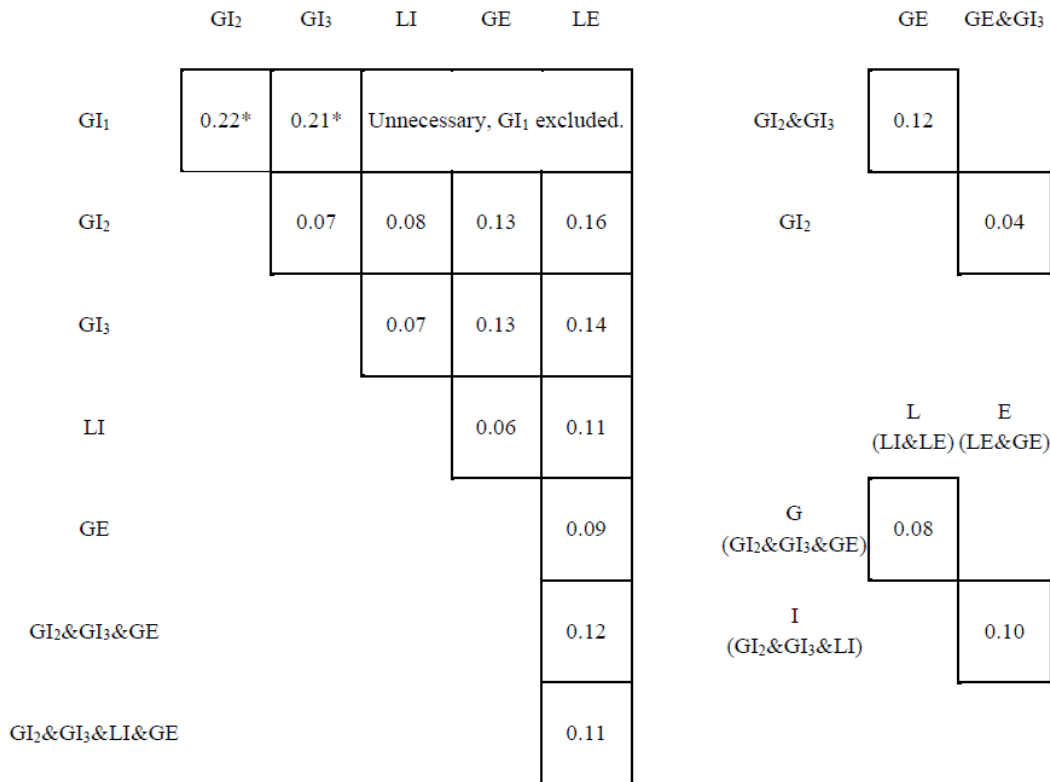

\* = no more than 10% chance of wrongly rejecting the hypothesis that the distributions are drawn from the same underlying distribution.

Figure A5: Significantly different distributions?

Comment: For each comparison between (combinations of) versions, we compute four K-S statistics comparing, respectively: (i) the distribution of  $r_1$ ; the distribution of  $r_2$ ; and (iii) the sums of the parallels to the diagonal  $r_1 = r_2$ , starting in the NW corner. We report the largest of these. We focus on the salient groupings and on the individual version that, besides Version GI<sub>1</sub>, was most different from others (Version LE). Version GI<sub>1</sub> fails these tests; all other combinations investigated pass our K-S tests.

## 5 Demography and Correlations

|          | All         | GI <sub>2</sub> | GI <sub>3</sub> | LI    | LE    | GE    |
|----------|-------------|-----------------|-----------------|-------|-------|-------|
| Female   | 55.0% (220) | 52.6%           | 52.5%           | 48.9% | 57.5% | 64.2% |
| Male     | 45.0% (180) | 47.4%           | 47.5%           | 51.1% | 42.5% | 35.8% |
| Students | 82.8% (331) | 89.5%           | 91.3%           | 80.0% | 75.3% | 77.8% |
| Other    | 17.3% (69)  | 10.5%           | 8.8%            | 20.0% | 24.7% | 22.2% |
|          | Female      | Male            |                 |       |       |       |
| Student  | 55.0%       | 45.0%           |                 |       |       |       |
| Other    | 55.1%       | 44.9%           |                 |       |       |       |

Table A10: Gender and status

The distribution of gender and status (student or not a student) is presented in Table A10. The dataset consists of 400 subjects, of which 55% (220) are female and 45% (180) are male. The percentage of females is lowest in Version LI (48.9%) and highest in Version GE (64.2%). A large majority (83%) are students. The gender distribution between students and non-students is almost identical. The percentage of students is lowest in Version LE (75.3%) and highest in Version GI<sub>3</sub> (91.3%).

|         | Students | Other    | All       |
|---------|----------|----------|-----------|
| < 20    | 15% (51) | 1% (1)   | 13% (52)  |
| 20 – 29 | 79%(262) | 49%(34)  | 74% (296) |
| 30 – 39 | 5% (17)  | 28% (19) | 9% (36)   |
| 40 – 49 | 0% (1)   | 14% (10) | 3% (11)   |
| ≥ 50    | 0% (0)   | 7% (5)   | 1% (5)    |

*Comment:* The youngest subjects are 18 years old (16 subjects), the median age is 22 years, and the oldest is 71 years old.

Table A11: Age distribution

The age distribution is presented in Table A11. The age ranges from 18 to 71 years. The majority of subjects (74%) are 20 to 29 years old, while 13% are younger than 20 years old and 13% are older than 30. Note that the age distribution of students and non-students differs.

|     | status    | gender   | age     |
|-----|-----------|----------|---------|
| M n | -0.17**** | 0.11**   | 0.01    |
| waa | 0.05      | -0.05    | -0.00   |
| saa | 0.06      | -0.12**  | -0.07   |
| stp | -0.00     | -0.02    | -0.03   |
| PIR | 0.08      | -0.15*** | -0.12** |
| was | -0.07     | 0.09*    | 0.04    |
| sas | -0.07     | 0.12**   | 0.00    |

*Comment a:* \* $p < 0.1$ , \*\* $p < 0.05$ , \*\*\* $p < 0.01$ , \*\*\*\* $p < 0.001$ .

*Comment b:* Point-Biserial correlation coefficient for status and gender, and Pearson correlation coefficient for age.

Table A12: Correlation coefficients

Table A12 presents correlation coefficients and their significance. The measure of inconsistency ( $M_n$ ) is negatively correlated with being a student. Being female is positively correlated with the measure of inconsistency and with ambiguity seeking (sas and was) while it is negatively correlated with PIR. Finally, age is negatively correlated with PIR.

## 6 Test Statistics

### 6.1 The Hypothesis

We consider two kinds of categories: different versions and different consistency groups. The aim is to test whether the difference between categories' proportions of ambiguity attitudes is significant. For each category  $i$  and type  $T$ , let  $\hat{\rho}_{i,T}$  be the observed proportion in our dataset. Also, let  $\rho_i$  be the proportion in the (true) population and  $N_i$  be the total number of subjects in category  $i$  in our dataset. Consider two categories,  $i$  and  $j$ . Our null hypothesis is that  $\rho_{i,T} = \rho_{j,T} = \rho_T$ .

### 6.2 Unconditional

Assume that we are considering the data from two versions. Under the null hypothesis, the distribution of  $N_i \cdot (\hat{\rho}_{i,T} - \hat{\rho}_{j,T})$ , is approximately normal with the following mean and variance:

$$\begin{aligned} E[N_i \cdot (\hat{\rho}_{i,T} - \hat{\rho}_{j,T})] &= 0, \\ \text{Var}[N_i \cdot (\hat{\rho}_{i,T} - \hat{\rho}_{j,T})] &= (N_i^{-1} + N_j^{-1})\rho_{ij,T}(1 - \rho_{ij,T}) = \sigma_{ij,T}^2. \end{aligned}$$

The best estimate for  $\rho_T$  is the maximum likelihood estimator giving all observations equal weight. That is simply the proportion of types  $T$  in version  $i$  and  $j$ . Let the observed difference be  $w_T$  and let  $z = \frac{x}{\sigma_{ij,T}}$ . Then our p-value is

$$p_{ij,T}^F = \sqrt{2/\pi} \int_{w/\sigma_{ij,T}}^{\infty} e^{-\frac{1}{2}z^2} dz. \quad (\text{A1})$$

### 6.3 Conditional

Now assume that we are considering the data from our three consistency groups: Low consistency, Middle consistency and High consistency. For each type  $T$ , we have  $\hat{\rho}_{L,T}$ ,  $\hat{\rho}_{M,T}$  and  $\hat{\rho}_{H,T}$ . Let  $\phi_{1,T} = \max\{\hat{\rho}_{L,T}, \hat{\rho}_{M,T}, \hat{\rho}_{H,T}\}$ ,  $\phi_{2,T} = \text{median}\{\hat{\rho}_{L,T}, \hat{\rho}_{M,T}, \hat{\rho}_{H,T}\}$ , and  $\phi_{3,T} = \min\{\hat{\rho}_{L,T}, \hat{\rho}_{M,T}, \hat{\rho}_{H,T}\}$ . Furthermore, let the corresponding total number of subjects in the groups be  $\Phi_{1,T}$ ,  $\Phi_{2,T}$  and  $\Phi_{3,T}$ .<sup>1</sup>

Now, let  $w_T = \phi_{1,T} - \phi_{3,T}$ . We want to calculate the probability of observing a difference greater than or equal to  $w_T$ . Since we are picking the largest and the smallest proportion we need to condition this on  $\phi_{1,T} > \phi_{2,T} > \phi_{3,T}$ .<sup>2</sup>

$$p_T^M = P(\phi_{1,T} - \phi_{3,T} \geq w_T \mid \phi_{1,T} > \phi_{2,T} > \phi_{3,T}).$$

Note that

$$\phi_{1,T} - \phi_{3,T} = \phi_{12,T} + \phi_{23,T},$$

<sup>1</sup>For example,  $\phi_{1,sas}$  is the proportion of subjects of type *sas* in the low consistency group and  $\Phi_{1,sas}$  is the number of subjects of all types in the low consistency group.

<sup>2</sup>Otherwise we would be calculating the probability of the difference between any two randomly chosen proportions to be greater than or equal to  $w_T$ .



where  $\phi_{12,T} = \phi_{1,T} - \phi_{2,T}$  and  $\phi_{23,T} = \phi_{2,T} - \phi_{3,T}$ . The density function for  $\phi_{ij,T}$  is

$$f_{ij,T}(x) = \begin{cases} \frac{2}{\sqrt{2\pi}\sigma_{ij,T}} e^{-\frac{1}{2}\left(\frac{x}{\sigma_{ij,T}}\right)^2} & x \geq 0, \\ 0 & x < 0. \end{cases}$$

The following arguments hold under the null hypothesis. Since  $\phi_{12,T}$  and  $\phi_{23,T}$  are two independent random variables, the density function for  $\phi_T$  is the convolution of  $f_{12,T}$  and  $f_{23,T}$ ,

$$f_T(y) = \frac{2}{\pi} \int_{w_T/\sigma_T}^{\infty} e^{-\frac{1}{2}z^2} dz \int_{-z\frac{\sigma_{12,T}}{\sigma_{23,T}}}^{z\frac{\sigma_{23,T}}{\sigma_{12,T}}} e^{-\frac{1}{2}v^2} dv, \quad (\text{A2})$$

where  $v = \frac{\sigma_T}{\sigma_{12,T}\sigma_{23,T}}(x - y\frac{\sigma_{12,T}^2}{\sigma_T^2})$ ,  $z = \frac{y}{\sigma}$  and  $\sigma_T^2 = \sigma_{12,T}^2 + \sigma_{23,T}^2$ .

## References

- Bade, S. (2015). Randomization devices and the elicitation of ambiguity-averse preferences. *Journal of Economic Theory*, 159:221–235.
- Binmore, K., Stewart, L., and Voorhoeve, A. (2012). How much ambiguity aversion? *Journal of risk and uncertainty*, 45(3):215–238.
- Charness, G., Karni, E., and Levin, D. (2013). Ambiguity attitudes and social interactions: An experimental investigation. *Journal of Risk and Uncertainty*, 46(1):1–25.
- Oechssler, J. and Roomets, A. (2014). Unintended hedging in ambiguity experiments. *Economics Letters*, 122(2):243–246.

## Instructions and sample choices.

### Version Gain, Implicit 3

#### Introductory screens

p. 1

Thank you for participating in this experiment. This experiment has several stages:

1. A practice round. This familiarizes you with the basic setup and is **NOT** played for money.
2. Twenty-four choices from card decks. At the end of the experiment, two of these choices will be randomly selected to be played for money.
3. Some survey questions.
4. The randomly selected decks will be played for real.

[Click here to continue](#)

p. 2

You will be given some information about various decks of coloured cards. Each deck will contain three colours. For example, these may be RED, BLACK or WHITE.

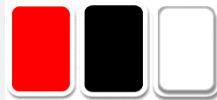

For each deck, you must choose which colour or colours to bet on. Sometimes you will only be able to choose one colour, sometimes you will be able to choose two. You win if (and only if) the card drawn from the deck is a colour you chose.

[Click here to continue](#)

p. 3

Each deck of cards contains only cards that are RED, BLACK or WHITE. The number of cards of each colour will vary with each new deck. You will always be told how many cards are in each deck. You will also be told the number of RED cards in each deck, but the precise number of BLACK cards and the precise number of WHITE cards will be kept a secret.

For example, the deck below has 6 RED cards and 15 cards that are BLACK or WHITE, but only we know how many of these 15 cards (which we show as grey with a '?') are BLACK and how many are WHITE.

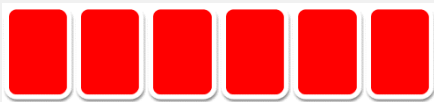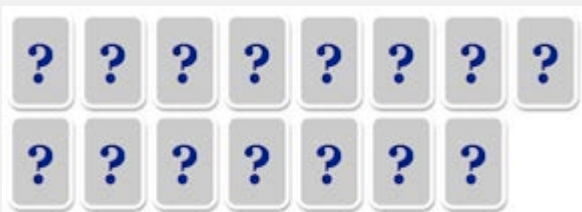

Click here to continue

p. 4

It could be that all the cards that are **NOT** RED are BLACK  
*(put your mouse cursor over the '?' cards to view)*

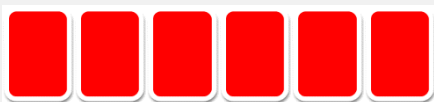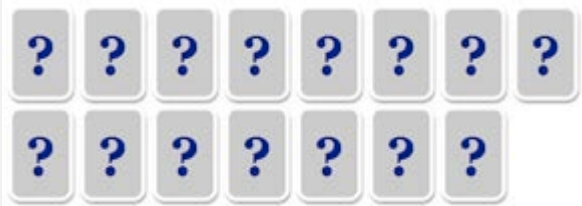

(Note: when the subject placed the mouse over the '?' cards, they 'flipped' to show that they are all BLACK)

Click here to continue

p. 5

Or it could be that all the cards that are **NOT** RED are WHITE  
(put your mouse cursor over the '?' cards to view)

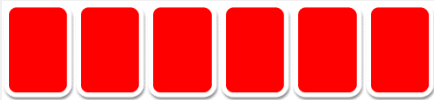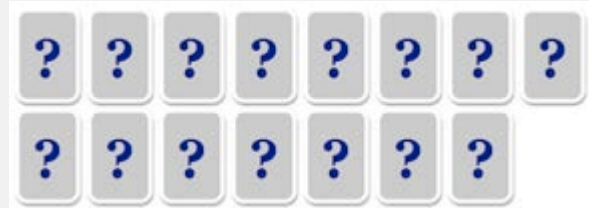

(Note: when the subject placed the mouse over the '?' cards, they 'flipped' to show that they are all WHITE)

Click here to continue

p. 6

Or it could be that the cards that are **NOT** RED are one of the many possible mixtures of BLACK and WHITE. For example (put your mouse cursor over the '?' cards to view):

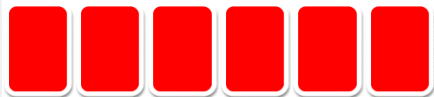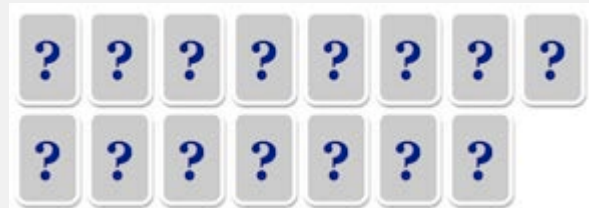

(Note: when the subject placed the mouse over the '?' cards, they 'flipped' to show that they are a mix of BLACK cards and WHITE cards)

Click here to continue

### Practice Choice 1 (Not for money)

Each deck of cards will be placed in a card shuffler. The third card from the top wins. Your task is to choose a winning colour. Here is a practice choice in which you can bet on one colour only: either on RED or on BLACK:

6 Red cards

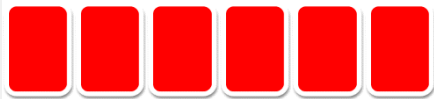

29% Red

15 Black or White cards

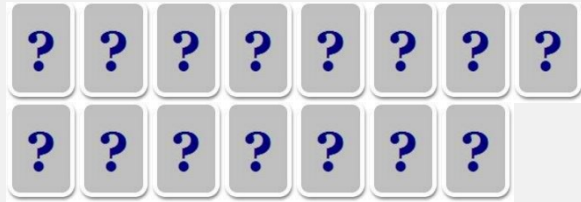

71% Black or White

Please click on your choice of winning card

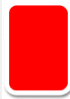

Red

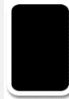

Black

### Practice Choice 2 (Not for money)

In this practice choice your choices are restricted to RED & BLACK or WHITE & BLACK:

If you choose RED & BLACK, you avoid losing if the third card from the top turns out to be BLACK or RED. If you choose WHITE & BLACK, you win if the top card turns out to be WHITE or BLACK. Otherwise you lose.

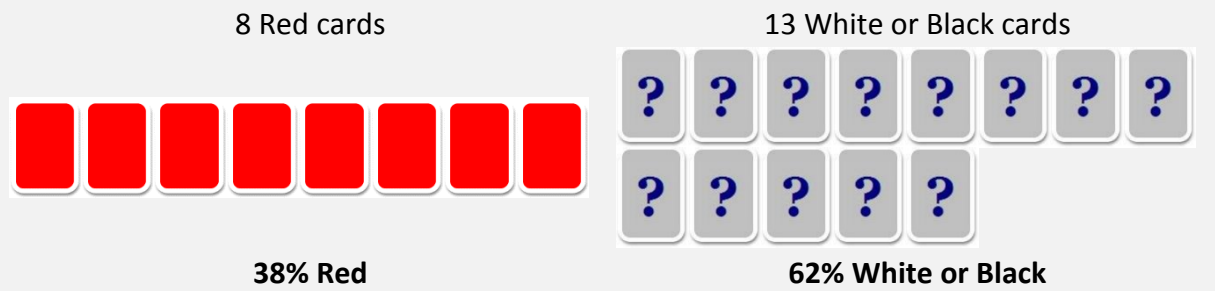

Please click on your choice of winning cards

|                                                                                    |                                                                                    |                                                                                    |                                                                                    |
|------------------------------------------------------------------------------------|------------------------------------------------------------------------------------|------------------------------------------------------------------------------------|------------------------------------------------------------------------------------|
|  |  |  |  |
| <input type="button" value="Red &amp; White"/>                                     |                                                                                    | <input type="button" value="White &amp; Black"/>                                   |                                                                                    |

**Now please get up and come to the front of the room**, where the experimenter will show you how the deck of cards is shuffled for the two practice choices. If these had been played for real, would you have won?

When you get back, please

p. 10

## 2. Introduction to ROUND 1 of the main experiment (for money)

This round of the main experiment consists of **two** equally important parts. In each part, you will make three choices.

**Part 1.** You will choose either RED or BLACK for three different decks of cards.

**Part 2.** You will choose either 'RED & WHITE' or 'WHITE & BLACK' for three different decks of cards. The decks used in this part of the experiment are the same as those used in the first part.

[Click here to continue](#)

p. 11

### Part 1

In this part, you must choose to bet on RED or BLACK

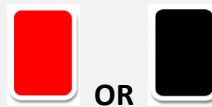

[Click here to continue](#)

## A sample $R_k$ versus $B_a$ screen

If you win, you **get £11**; otherwise, you get only **£3**.

---

10 Red cards

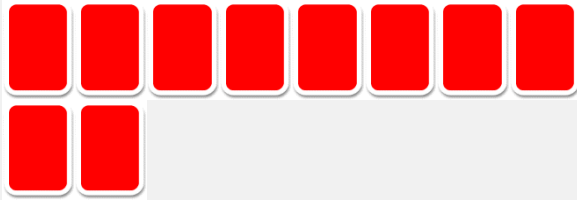

20 White or Black cards

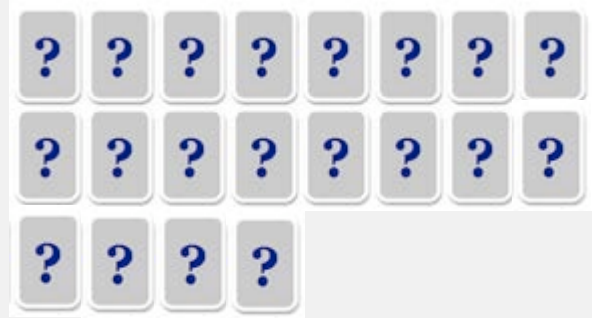

33% Red

67% White or Black

---

Please click on your choice of winning card

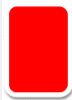

Red

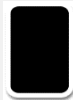

Black



**Part 2**

In this part, you must choose to bet on 'RED & WHITE' or 'WHITE & BLACK'

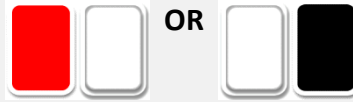

Click here to continue

**A sample  $R&W_a$  versus  $W&B_k$  screen**

If you win, you **get £7**; otherwise, you get only **£3**.

10 Red cards

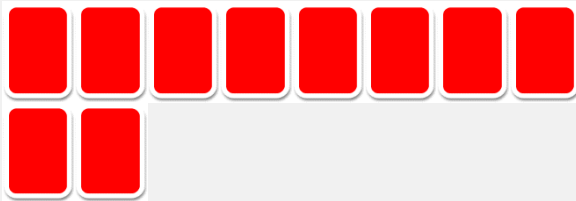

20 White or Black cards

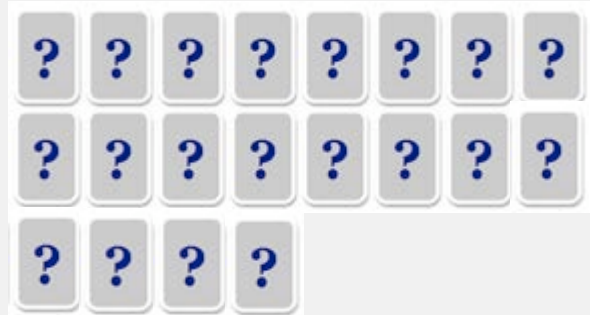

33% Red

67% White or Black

Please click on your choice of winning card

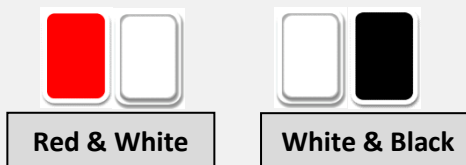

**After subjects had completed both parts of round 1, the following screen was displayed:**

**Introduction to ROUND 2 (for money)**

In this round, you will now face another six choices just like the ones you just made, except that we will be using **NEW** card decks.

The rules are the same as in the first round, but with different colours:

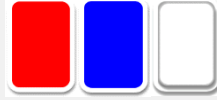

**Part 1.** You will choose either RED or BLUE as the winning card.

**Part 2.** You will choose either 'RED & WHITE' or 'WHITE & BLUE' as the winning cards.

Click here to continue

The same screen was displayed after subsequent rounds, except that the relevant colours changed.

# Version Loss, Implicit

## Introductory screens

p. 1

Thank you for participating in our experiment.

You have been given £25 worth of plastic coins. **Your aim is to lose as few as possible.** At the end of the experiment, each coin you have **kept** will be worth £1 in real money.

In the experiment, you will make many choices between gambles (based on card decks) in which these coins are at stake. At the end of the experiment, two of these gambles will be randomly selected to be played **for real**.

If you win both gambles, you will keep all your coins and leave with £25. If you lose one or both gambles, you will lose some of your coins. You can never lose more than £20 worth of coins.

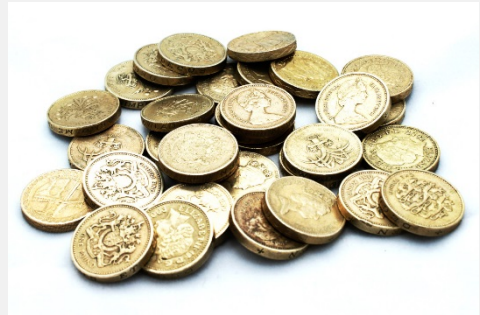

[Click here to continue](#)

p. 2

This experiment has several stages:

1. A practice round. This familiarizes you with the basic setup and is **NOT** played for money.
2. Twenty-four choices from card decks. At the end of the experiment, two of these choices will be randomly selected to be played for money.
3. Some survey questions.
4. The randomly selected decks will be played for real.

[Click here to continue](#)

p. 3

You will be given some information about various decks of coloured cards. Each deck will contain three colours. For example, these may be RED, BLACK or WHITE.

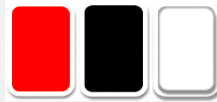

For each deck, you must choose which colour or colours to bet on. Sometimes you will only be able to choose one colour, sometimes you will be able to choose two. You avoid losing if (and only if) the card drawn from the deck is a colour you chose.

[Click here to continue](#)

p. 4

Each deck of cards contains only cards that are RED, BLACK or WHITE. The number of cards of each colour will vary with each new deck. You will always be told how many cards are in each deck. You will also be told the number of RED cards in each deck, but the precise number of BLACK cards and the precise number of WHITE cards will be kept a secret.

For example, the deck below has 6 RED cards and 15 cards that are BLACK or WHITE, but only we know how many of these 15 cards (which we show as grey with a '?') are BLACK and how many are WHITE.

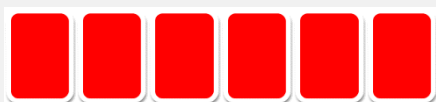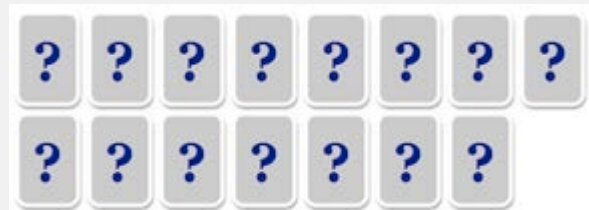

[Click here to continue](#)

p. 5

It could be that all the cards that are **NOT** RED are BLACK  
*(put your mouse cursor over the '?' cards to view)*



(Note: when the subject placed the mouse over the '?' cards, they 'flipped' to show that they are all BLACK)

Click here to continue

p. 6

Or it could be that all the cards that are **NOT** RED are WHITE  
*(put your mouse cursor over the '?' cards to view)*

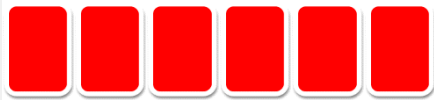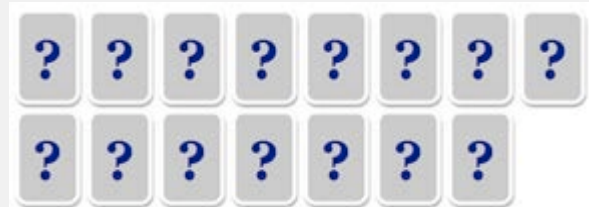

(Note: when the subject placed the mouse over the '?' cards, they 'flipped' to show that they are all WHITE)

Click here to continue

Or it could be that the cards that are **NOT** RED are one of the many possible mixtures of BLACK and WHITE. For example (*put your mouse cursor over the '?' cards to view*):

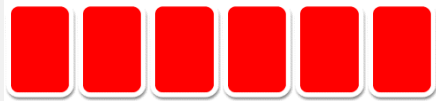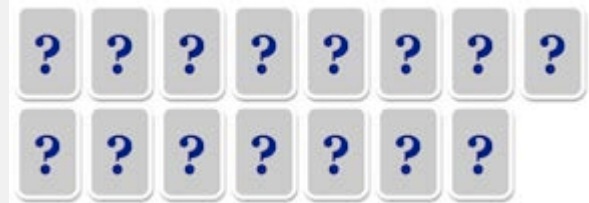

(Note: when the subject placed the mouse over the '?' cards, they 'flipped' to show that they are a mix of BLACK cards and WHITE cards)

[Click here to continue](#)

**Practice Choice 1 (Not for money)**

Each deck of cards will be placed in a card shuffler. The third card from the top wins. Your task is to avoid choosing a losing colour. Here is a practice choice in which you can bet on one colour only: either on RED or on BLACK:

6 Red cards

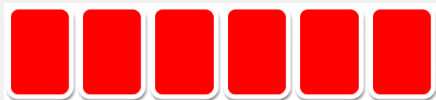

29% Red

15 White or Black cards

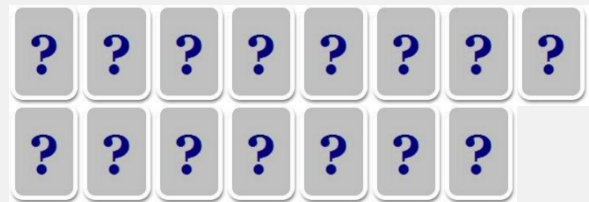

71% White or Black

Please click on your choice of winning card

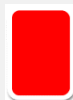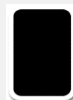

Red

Black

**Practice Choice 2 (Not for money)**

In this practice choice your guesses are restricted to RED & BLACK or WHITE & BLACK:

If you choose RED & BLACK, you avoid losing if the third card from the top turns out to be BLACK or RED. If you choose WHITE & BLACK, you win if the top card turns out to be WHITE or BLACK. Otherwise you lose.

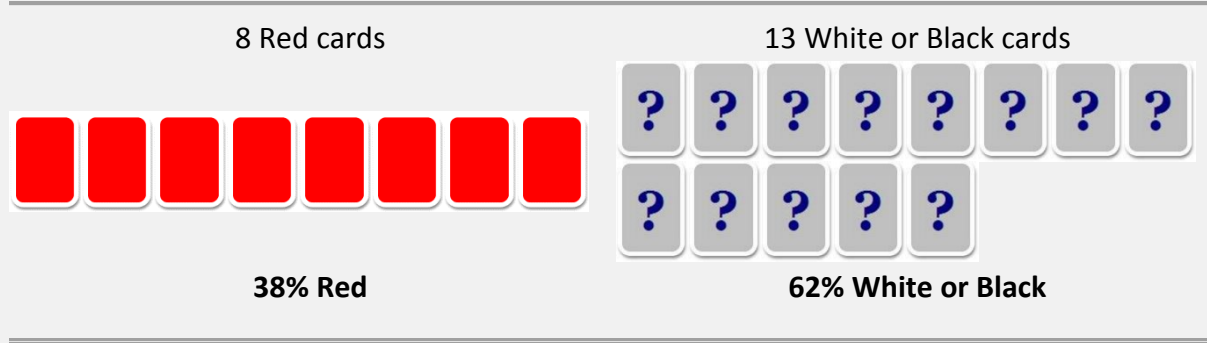

Please click on your choice of winning cards

|                                                                                    |                                                                                     |
|------------------------------------------------------------------------------------|-------------------------------------------------------------------------------------|
|  |  |
|------------------------------------------------------------------------------------|-------------------------------------------------------------------------------------|

**Now please get up and come to the front of the room**, where the experimenter will show you how the deck of cards is shuffled for the two practice choices. If these had been played for real, would you have avoided losing some of your coins?

When you get back, please

Click here to continue

p. 11

## **2. Introduction to ROUND 1 of the main experiment (for money)**

This round of the main experiment consists of **two** equally important parts. In each part, you will make three choices.

**Part 1.** You will choose either RED or BLACK for three different decks of cards.

**Part 2.** You will choose either 'RED & WHITE' or 'WHITE & BLACK' for three different decks of cards. The decks used in this part of the experiment are the same as those used in the first part.

[Click here to continue](#)

p. 12

### **Round 1, Part 1**

In this part, you must choose to bet on RED or BLACK

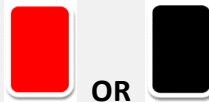

[Click here to continue](#)



## A sample $R_k$ versus $B_a$ screen

If you win, you **keep your money**; otherwise, you **lose £8**.

---

10 Red cards

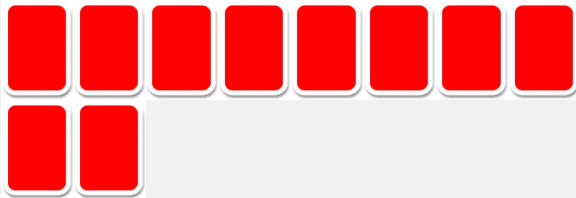

20 White or Black cards

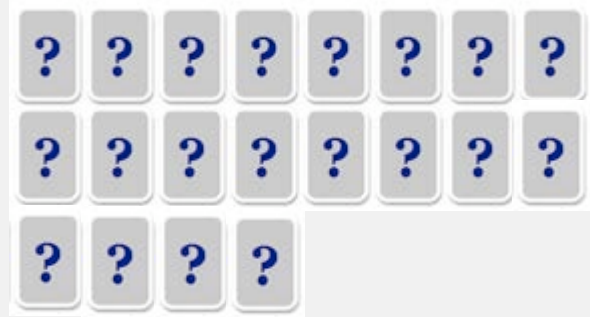

33% Red

67% White or Black

---

Please click on your choice of winning card

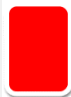

Red

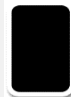

Black

**Round 1, Part 2**

In this part, you must choose to bet on  
**'RED & WHITE'** or **'WHITE & BLACK'**

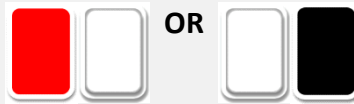

Click here to continue

**A sample  $R&W_a$  versus  $W&B_k$  screen**

If you win, you **keep** your money; otherwise you **lose £4**.

10 Red cards

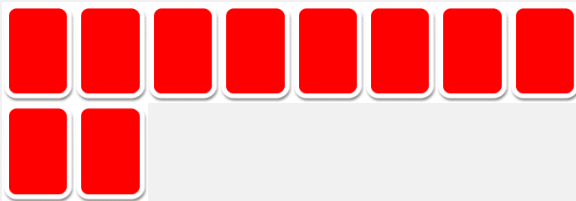

20 White or Black cards

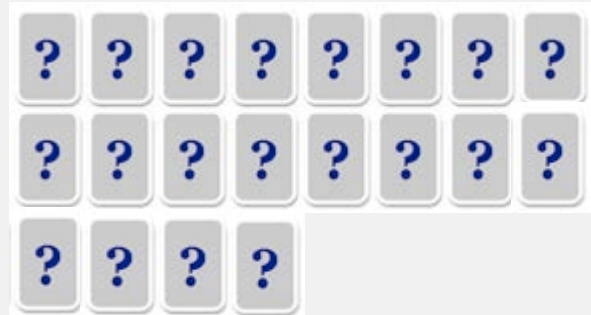

33% Red

67% White or Black

Please click on your choice of winning card

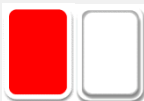

Red & White

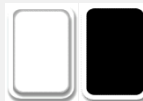

White & Black

**After subjects had completed both parts of round 1, the following screen was displayed:**

### Introduction to ROUND 2 (for money)

In this round, you will now face another six choices just like the ones you just made, except that we will be using **NEW** card decks.

The rules are the same as in the first round, but with different colours:

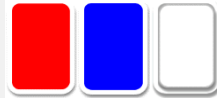

**Part 1.** You will choose either RED or BLUE as the winning card.

**Part 2.** You will choose either 'RED & WHITE' or 'WHITE & BLUE' as the winning cards.

[Click here to continue](#)

The same screen was displayed after subsequent rounds, except that the relevant colours changed.

# Version Loss, Explicit

## Introductory screens

p. 1

Thank you for participating in our experiment.

You have been given £25 worth of plastic coins. **Your aim is to lose as few as possible.** At the end of the experiment, each coin you have **kept** will be worth £1 in real money.

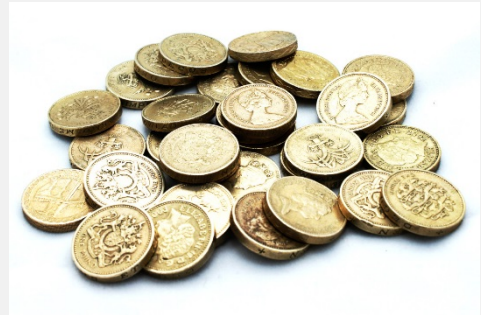

In the experiment, you will make many choices between gambles (based on card decks) in which these coins are at stake. At the end of the experiment, two of these gambles will be randomly selected to be played **for real**.

If you win both gambles, you will keep all your coins and leave with £25. If you lose one or both gambles, you will lose some of your coins. You can never lose more than £20 worth of coins.

[Click here to continue](#)

p. 2

This experiment has several stages:

1. A practice round. This familiarizes you with the basic setup and is **NOT** played for money.
2. Twenty-four choices from card decks. At the end of the experiment, two of these choices will be randomly selected to be played for money.
3. Some survey questions.
4. The randomly selected decks will be played for real.

[Click here to continue](#)

p. 3

You will be given some information about various decks of coloured cards. Each deck will contain three colours. For example, these may be RED, BLACK or WHITE.



For each deck, you must choose which colour or colours to bet on. Sometimes you will only be able to choose one colour, sometimes you will be able to choose two. You avoid losing if (and only if) the card drawn from the deck is a colour you chose.

[Click here to continue](#)

p. 4

Each deck of cards contains only cards that are RED, BLACK or WHITE. The number of cards of each colour will vary with each new deck. You will always be told how many cards are in each deck. You will also be told the number of RED cards in each deck, but the precise number of BLACK cards and the precise number of WHITE cards will be kept a secret.

For example, the deck below has 6 RED cards and 15 cards that are BLACK or WHITE, but only we know how many of these 15 cards (which we show as grey with a '?') are BLACK and how many are WHITE.

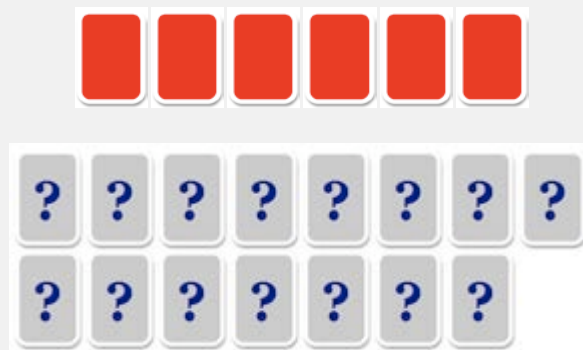

[Click here to continue](#)

p. 5

It could be that all the cards that are **NOT** RED are BLACK  
*(put your mouse cursor over the '?' cards to view)*

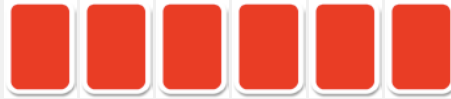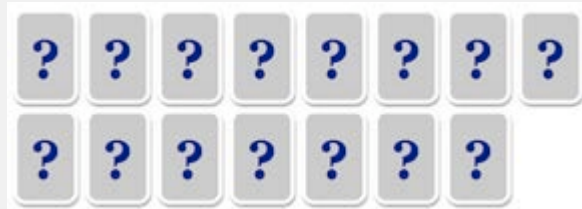

(Note: when the subject placed the mouse over the '?' cards, they 'flipped' to show that they are all BLACK)

Click here to continue

p. 6

Or it could be that all the cards that are **NOT** RED are WHITE  
*(put your mouse cursor over the '?' cards to view)*

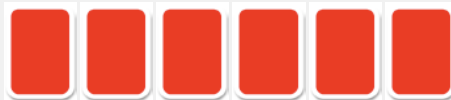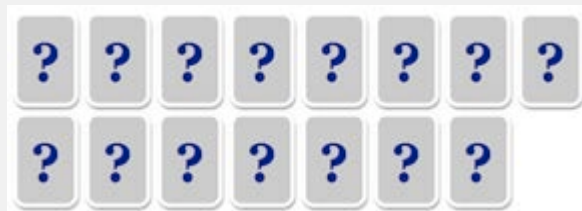

(Note: when the subject placed the mouse over the '?' cards, they 'flipped' to show that they are all WHITE)

Click here to continue

Or it could be that the cards that are **NOT** RED are one of the many possible mixtures of BLACK and WHITE. For example (*put your mouse cursor over the '?' cards to view*):

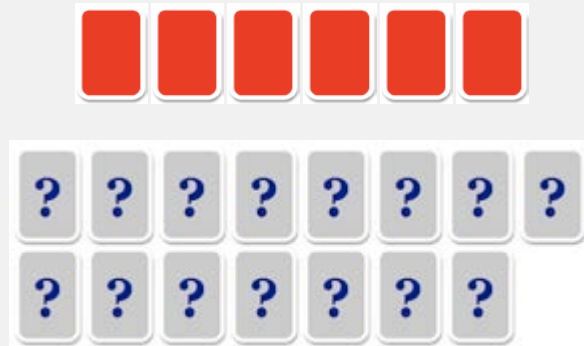

(Note: when the subject placed the mouse over the '?' cards, they 'flipped' to show that they are a mix of BLACK cards and WHITE cards)

[Click here to continue](#)

### Practice Choice 1 (Not for money)

You will make choices between betting on a colour or colours for which you know the chance of winning, and a colour or colours for which you do **NOT** know the chance of winning.

For example, in the following practice choice:

If you bet on RED, your chance of winning is 29% (because the number of RED cards is 6 out of a total of 21 cards in the deck).

If you bet on WHITE, your chance of winning ranges from 0% to 71% (because the number of WHITE cards can range from 0 to 15 out of a total of 21 cards in the deck).

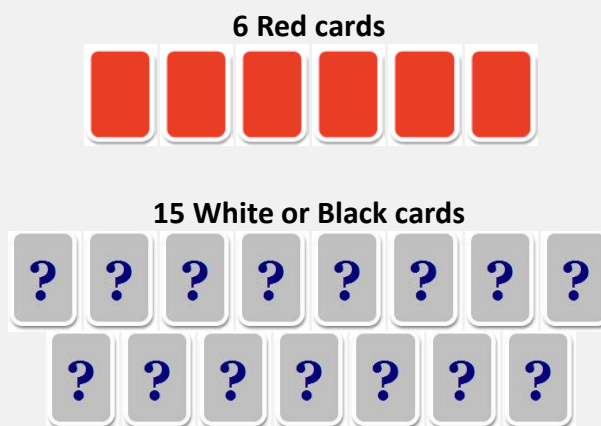

Please click on your choice of winning card

29% Red

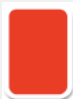

Red

From 0% to 71% White

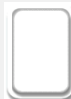

White



### Practice Choice 2 (Not for money)

In the following practice choice:

If you choose 'RED & WHITE', you win if the third card from the top in the shuffled deck is RED or WHITE. Your chance of winning ranges from 29% to 100% (because the number of cards that are RED or WHITE can range from 6 to 21 out of a total of 21 cards).

If you choose 'WHITE & BLACK', you win if the third card from the top in the shuffled deck is WHITE or BLACK. Your chance of winning is 71% (because the number of cards that are WHITE or BLACK is 15 out of a total of 21 cards).

---

6 Red cards

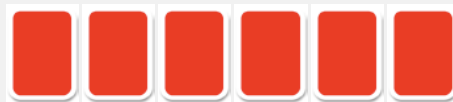

15 White or Black cards

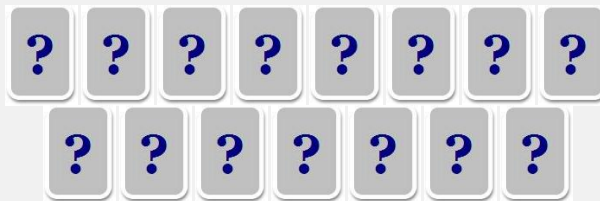

---

Please click on your choice of winning cards

From 29% to 100% Red or White

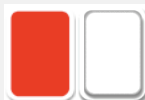

Red & White

71% White or Black

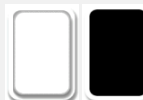

White & Black

p. 10

**Now please get up and come to the front of the room**, where the experimenter will show you how the deck of cards is shuffled for the two practice choices. If these had been played for real, would you have avoided losing some of your coins?

When you get back, please

[Click here to continue](#)

p. 11

## 2. Introduction to ROUND 1 of the main experiment (for money)

This round of the main experiment consists of **two** equally important parts. In each part, you will make three choices.

**Part 1.** You will choose either RED or BLACK for three different decks of cards.

**Part 2.** You will choose either 'RED & WHITE' or 'WHITE & BLACK' for three different decks of cards. The decks used in this part of the experiment are the same as those used in the first part.

[Click here to continue](#)

p. 12

### Part 1

In this part, you must choose to bet on RED or BLACK

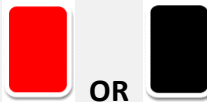

[Click here to continue](#)

## A sample $R_k$ versus $B_a$ screen

If you win, you **keep** your money. Otherwise you **lose £8**.

10 Red cards

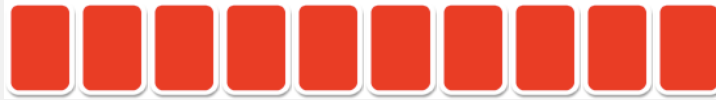

20 White or Black cards

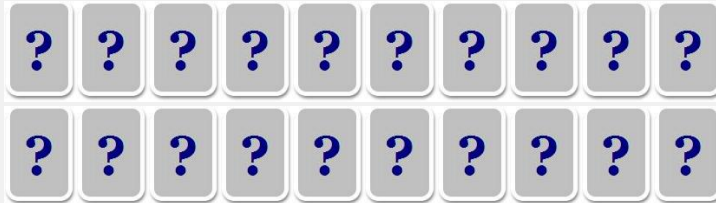

Please click on your choice of winning card

33% Red

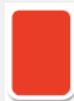

Red

From 0% to 67% Black

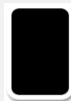

Black

**Part 2**

In this part, you must choose to bet on 'RED & WHITE' or 'WHITE & BLACK'

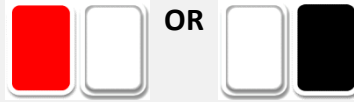

Click here to continue

**A sample  $R&W_a$  versus  $W&B_k$  screen**

If you win, you **keep** your money. Otherwise you **lose £4**.

10 Red cards

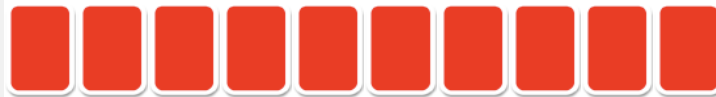

20 White or Black cards

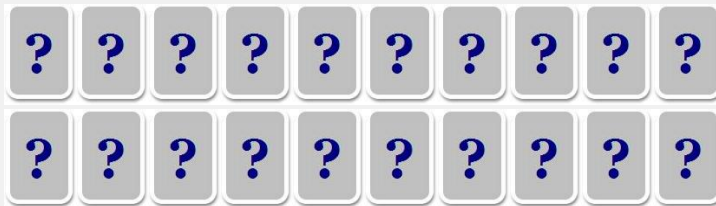

Please click on your choice of winning cards

From 33% to 100% Red or White

67% White or Black

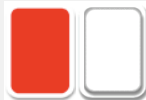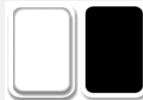

Red & White

White & Black

**After subjects had completed both parts of round 1, the following screen was displayed:**

### Introduction to ROUND 2 (for money)

In this round, you will now face another six choices just like the ones you just made, except that we will be using **NEW** card decks.

The rules are the same as in the first round, but with different colours:



**Part 1.** You will choose either RED or BLUE as the winning card.

**Part 2.** You will choose either 'RED & WHITE' or 'WHITE & BLUE' as the winning cards.

Click here to continue

The same screen was displayed after subsequent rounds, except that the relevant colours changed.

# Version Gain, Explicit

## Introductory screens

p. 1

Thank you for participating in this experiment. This experiment has several stages:

1. A practice round. This familiarizes you with the basic setup and is **NOT** played for money.
2. Twenty-four choices from card decks. At the end of the experiment, two of these choices will be randomly selected to be played for money.
3. Some survey questions.
4. The randomly selected decks will be played for real.

[Click here to continue](#)

p. 2

You will be given some information about various decks of coloured cards. Each deck will contain three colours. For example, these may be RED, BLACK or WHITE.

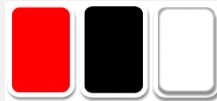

For each deck, you must choose which colour or colours to bet on. Sometimes you will only be able to choose one colour, sometimes you will be able to choose two. You win if (and only if) the card drawn from the deck is a colour you chose.

[Click here to continue](#)

Each deck of cards contains only cards that are RED, BLACK or WHITE. The number of cards of each colour will vary with each new deck. You will always be told how many cards are in each deck. You will also be told the number of RED cards in each deck, but the precise number of BLACK cards and the precise number of WHITE cards will be kept a secret.

For example, the deck below has 6 RED cards and 15 cards that are BLACK or WHITE, but only we know how many of these 15 cards (which we show as grey with a '?') are BLACK and how many are WHITE.

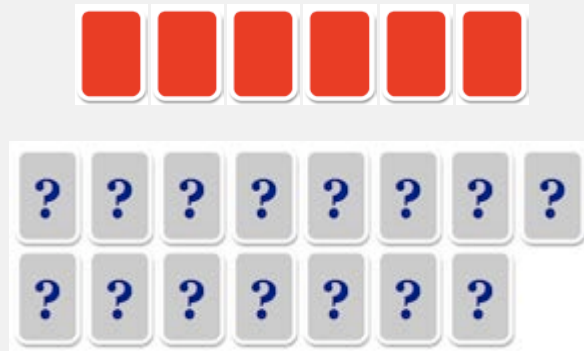

[Click here to continue](#)



p. 4

It could be that all the cards that are **NOT** RED are BLACK  
*(put your mouse cursor over the '?' cards to view)*



(Note: when the subject placed the mouse over the '?' cards, they 'flipped' to show that they are all BLACK)

[Click here to continue](#)

p. 5

Or it could be that all the cards that are **NOT** RED are WHITE  
*(put your mouse cursor over the '?' cards to view)*



(Note: when the subject placed the mouse over the '?' cards, they 'flipped' to show that they are all WHITE)

[Click here to continue](#)

Or it could be that the cards that are **NOT** RED are one of the many possible mixtures of BLACK and WHITE. For example (*put your mouse cursor over the '?' cards to view*):



(Note: when the subject placed the mouse over the '?' cards, they 'flipped' to show that they are a mix of BLACK cards and WHITE cards)

[Click here to continue](#)

**Practice Choice 1 (Not for money)**

You will make choices between betting on a colour or colours for which you know the chance of winning, and a colour or colours for which you do **NOT** know the chance of winning.

For example, in the following practice choice:

If you bet on RED, your chance of winning is 29% (because the number of RED cards is 6 out of a total of 21 cards in the deck).

If you bet on WHITE, your chance of winning ranges from 0% to 71% (because the number of WHITE cards can range from 0 to 15 out of a total of 21 cards in the deck).

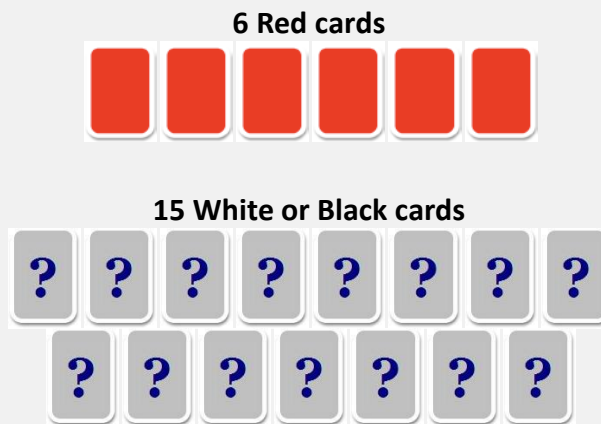

---

**Please click on your choice of winning card**

**29% Red**

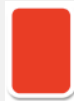

**Red**

**From 0% to 71% White**

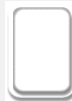

**White**

**Practice Choice 2 (Not for money)**

In the following practice choice:

If you choose 'RED and WHITE', you win if the third card from the top in the shuffled deck is RED or WHITE. Your chance of winning ranges from 29% to 100% (because the number of cards that are RED or WHITE can range from 6 to 21 out of a total of 21 cards).

If you choose 'WHITE and BLACK', you win if the third card from the top in the shuffled deck is WHITE or BLACK. Your chance of winning is 71% (because the number of cards that are WHITE or BLACK is 15 out of a total of 21 cards).

---

6 Red cards

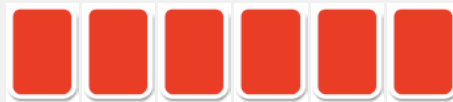

15 White or Black cards

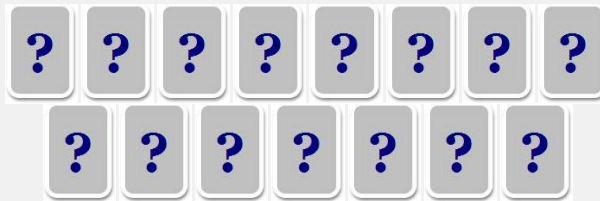

---

**Please click on your choice of winning cards**

From 29% to 100% Red or White

71% White or Black

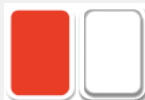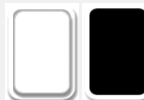

**Red & White**

**White & Black**

**Now please get up and come to the front of the room**, where the experimenter will show you how the deck of cards is shuffled for the two practice choices. If these had been played for real, would you have won?

When you get back, please

[Click here to continue](#)

p. 10

## 2. Introduction to ROUND 1 of the main experiment (for money)

This round of the main experiment consists of **two** equally important parts. In each part, you will make three choices.

**Part 1.** You will choose either RED or BLACK for three different decks of cards.

**Part 2.** You will choose either 'RED & WHITE' or 'WHITE & BLACK' for three different decks of cards. The decks used in this part of the experiment are the same as those used in the first part.

[Click here to continue](#)

p. 11

### Part 1

In this part, you must choose to bet on RED or BLACK

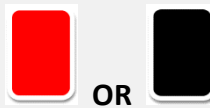

[Click here to continue](#)

### A sample $R_k$ versus $B_a$ screen

If you win, you **get £11**. Otherwise you **get only £3**.

10 Red cards

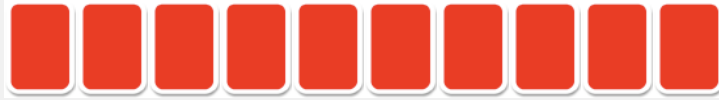

20 White or Black cards

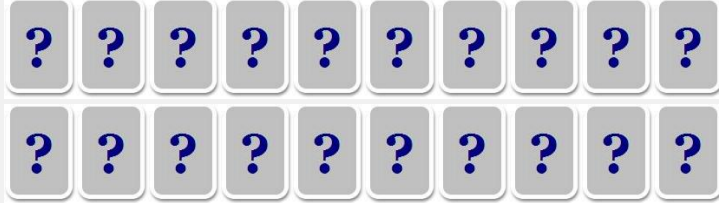

Please click on your choice of winning card

33% Red

From 0% to 67% Black

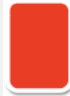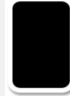

Red

Black

**Part 2**

In this part, you must choose to bet on 'RED & WHITE' or 'WHITE & BLACK'

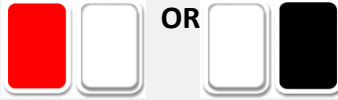

Click here to continue

**A sample  $R&W_a$  versus  $W&B_k$  screen**

If you win, you get £7. Otherwise you get only £3.

10 Red cards

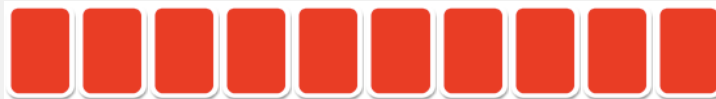

20 White or Black cards

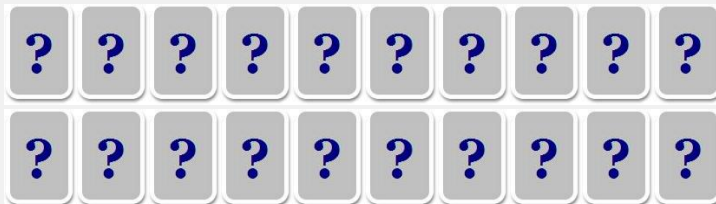

Please click on your choice of winning cards

From 33% to 100% Red or White

67% White or Black

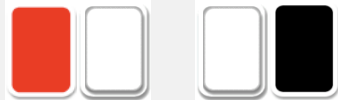

Red & White

White & Black

**After subjects had completed both parts of round 1, the following screen was displayed:**

### **Introduction to ROUND 2 (for money)**

In this round, you will now face another six choices just like the ones you just made, except that we will be using **NEW** card decks.

The rules are the same as in the first round, but with different colours:

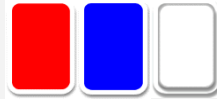

**Part 1.** You will choose either RED or BLUE as the winning card.

**Part 2.** You will choose either 'RED and WHITE' or 'WHITE and BLUE' as the winning cards.

[Click here to continue](#)

The same screen was displayed after subsequent rounds, except that the relevant colours changed.
